# Supplementary material for: Deciphering colour mechanisms in co-crystals and salts containing violuric acid and chosen l-amino acids
Source: Royal Society of Chemistry journal article supplement (doi:10.1039/d4tc03209h), 2024-01-01
Supplement: d4tc03209h1.pdf [file d4tc03209h1.pdf]

## Supporting information

### Deciphering colour mechanisms in co-crystals and salts containing violuric acid and chosen L-amino acids†

Agnieszka Rydz<sup>a</sup>, Marlena Gryl<sup>a\*</sup>, Katarzyna Ostrowska<sup>a</sup> and Katarzyna Marta Stadnicka<sup>a</sup>

<sup>a</sup>Faculty of Chemistry, Jagiellonian University, Gronostajowa 2, 30-387 Cracow (Poland). Corresponding author e-mail: [gryl@chemia.uj.edu.pl](mailto:gryl@chemia.uj.edu.pl)

#### Crystal Engineering

In order to design multi-component chromic materials composed of VA and AA, we started with a search in the Crystal Structural Database (CSD). We focused on crystal structures containing VA molecule or its anion to study hydrogen-bond motifs which are formed between VA and other components (including solvents). Based on these results (see SI), we design possible synthons which could occur between VA oxime group and AA, considering mainly ammonium and carboxylate groups (zwitterion form; Fig. S1). The carboxylate group can interact, e.g. with –OH oxime group (Fig. S1a), and ammonium group can form hydrogen bonds with either nitrogen and oxygen oxime atom (Fig. S2b, d). Bifurcated hydrogen bonds can be observed for VA as well for its anion, and could be formed via ammonium group of AA (Fig. 2c). The additional functional groups attached to the AA side chain, i.e. –OH, –NH<sub>2</sub>, imidazole or guanidine group can replace some interactions described above, or be engaged in hydrogen bonds with secondary amine and carbonyl group of VA instead of formation of  $R_2^2(8)$  dimers.

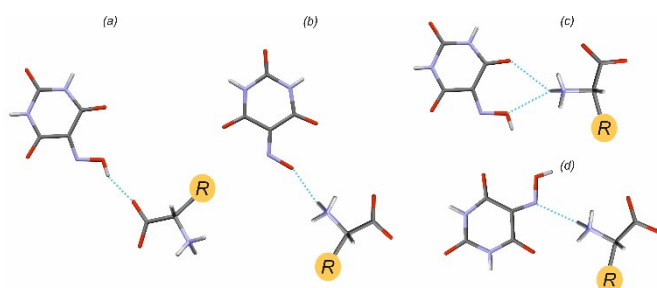

A CSD database search was narrowed to organic, not polymeric single crystals, with  $R_1$  parameter less than 10%. We have also included into the analysis two polymorphic forms of VA ( $P2_1/n^{31}$  and  $Cmc2_1^{32}$ ). One of the crystal structures (refcode KEDYOI<sup>33</sup>) was excluded from the final analysis due to severe disorder, making impossible to study hydrogen bonds involving VA oxime group. This analysis allowed us to identify the most frequent synthons (M1-M10) in materials containing VA or its deprotonated form (Fig. S2). The first assumption is, that VA molecules/anions likely form  $R_2^2(8)$  dimers (M1 motif observed in 89% of studied phases) which together extend into the tapes,

**Figure S1** Possible synthons which can be formed between VA molecule or anion and chosen AA (R denotes side chain of AA).

decreasing the number of possible donor and acceptor sites in VA. Thus, we can expect that this motif could also be present in our multicomponent crystal structures with selected AA. Because of that, further analysis was especially focused on hydrogen-bond preferences of the nitrogen and oxygen atoms in the oxime group. Single hydrogen bond of N-H...N (M6) and O-H...O type (M10) involving nitrogen oxime atom as an acceptor and oxygen oxime atom as a donor, respectively, are observed in 29% of the searched structures. Also, in the salt phases, the anion of VA frequently participates in the O-H...O interaction (M7; 24%). Carbonyl groups located in the vicinity of the oxime group enable formation of bifurcated hydrogen bonds either via N-H (M4, M9) or O-H (M3) donors (24, 19, 24%, respectively). Table S1 shows a summarized data for crystal structures included in the analysis.

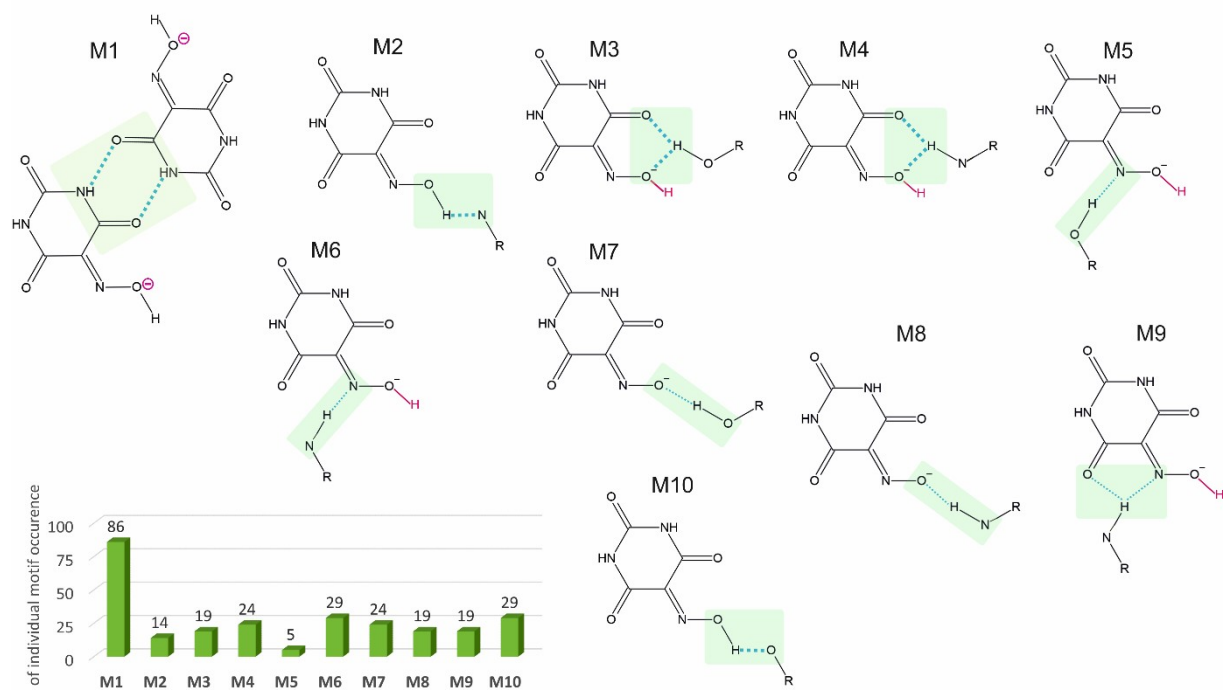

**Fig. S2** Structural synthons found in the phases containing VA from our CSD search. On the bottom, the graph with percentage population of each motif found in those structures is presented. H-atoms and anion form of VA (<sup>-</sup>) shown in magenta means that a motif is observed for VA as well for its anion.

**Table S1** The summarized data for the crystal structures included in the search. MX denotes a particular motif, and  $R_1$  means the R-factor from the final refinement. Motifs including bifurcated hydrogen bonds, i.e. M3, M4 and M9 were taken into account if the difference in H...A distance between two hydrogen bonds was not greater than 0.2 Å. O denotes that motif is observed, X denotes that motif is absent.

|                      | M1 | M2 | M3 | M4 | M5 | M6 | M7 | M8 | M9 | M10 | $R_1$ |
|----------------------|----|----|----|----|----|----|----|----|----|-----|-------|
| BENPIW <sup>1</sup>  | O  | O  | X  | O  | X  | X  | X  | X  | X  | O   | 7.5%  |
| DAYHIV <sup>2</sup>  | O  | X  | X  | X  | X  | X  | X  | X  | X  | O   | 4.1%  |
| FIYXUJ <sup>3</sup>  | O  | X  | O  | X  | X  | X  | O  | X  | O  | O   | 6.2%  |
| FIYYAQ <sup>3</sup>  | X  | X  | X  | X  | X  | O  | X  | O  | X  | O   | 5.6%  |
| FIYYEU <sup>3</sup>  | X  | X  | X  | X  | X  | X  | X  | X  | X  | O   | 5.3%  |
| FUFPIG <sup>*4</sup> | X  | X  | X  | X  | X  | O  | X  | X  | O  | O   | 6.3%  |
| FUFPOM <sup>4</sup>  | X  | X  | O  | X  | X  | O  | X  | X  | X  | O   | 3.7%  |
| FUFPUS <sup>*4</sup> | X  | X  | X  | X  | X  | O  | X  | X  | O  | O   | 8.8%  |
| FUFQAZ <sup>4</sup>  | O  | X  | X  | X  | X  | X  | O  | X  | X  | O   | 3.2%  |
| JEFSUL <sup>1</sup>  | X  | X  | X  | X  | X  | O  | O  | O  | X  | O   | 7.1%  |
| JEFTAS <sup>1</sup>  | X  | X  | X  | O  | X  | O  | X  | X  | X  | O   | 8.1%  |
| MUYTAC <sup>5</sup>  | X  | O  | O  | X  | X  | X  | X  | X  | X  | O   | 5.4%  |
| MUYVOS <sup>*5</sup> | X  | O  | X  | X  | X  | X  | X  | X  | X  | X   | 5.2%  |
| PUQTIF <sup>6</sup>  | X  | X  | X  | X  | X  | X  | X  | O  | X  | X   | 4.9%  |

|                        |   |   |   |   |   |   |   |   |   |   |      |
|------------------------|---|---|---|---|---|---|---|---|---|---|------|
| WURCUJ* <sup>7</sup>   | X | X | X | X | X | X | X | X | X | O |      |
| XIMKUA <sup>8</sup>    | X | X | X | X | X | X | X | O | X | O | 5.3% |
| KOBNAT <sup>9</sup>    | X | X | X | O | X | X | O | X | X | O | 4.0% |
| KOBNIB01 <sup>9</sup>  | X | X | X | O | O | X | X | X | X | O | 8.1% |
| KOBNIB <sup>9</sup>    | X | X | X | O | X | X | O | X | X | O | 6.7% |
| VIOLME03 <sup>10</sup> | O | X | O | X | X | X | X | X | X | O | 2.8% |
| VIOLME04 <sup>11</sup> | O | X | X | X | X | X | X | X | O | X | 4.5% |

\* water molecules without hydrogens in a crystal structure

Table S2. Crystal data and details of structure refinement for the studied crystal structures.

|                                            | VASer                                                                           | VATyr                                                                           | VATrp*                                                                                 | VATrp                                                                          | VALys                                                                                                 | VAHis                                                                                    |
|--------------------------------------------|---------------------------------------------------------------------------------|---------------------------------------------------------------------------------|----------------------------------------------------------------------------------------|--------------------------------------------------------------------------------|-------------------------------------------------------------------------------------------------------|------------------------------------------------------------------------------------------|
| Empirical formula                          | C <sub>7</sub> H <sub>14</sub> N <sub>4</sub> O <sub>9</sub>                    | C <sub>13</sub> H <sub>20</sub> N <sub>4</sub> O <sub>10</sub>                  | C <sub>15</sub> H <sub>19</sub> N <sub>5</sub> O <sub>8</sub>                          | C <sub>15</sub> H <sub>15</sub> N <sub>5</sub> O <sub>6</sub>                  | C <sub>20</sub> H <sub>38</sub> N <sub>10</sub> O <sub>14</sub>                                       | C <sub>20</sub> H <sub>28</sub> N <sub>12</sub> O <sub>14</sub>                          |
| Formula weight [g/mol]                     | 298.22                                                                          | 392.33                                                                          | 397.35                                                                                 | 361.32                                                                         | 642.60                                                                                                | 660.54                                                                                   |
| Temperature [K]                            | 298(2)                                                                          | 100(2)                                                                          | 130(2)                                                                                 | 298(2)                                                                         | 100(2)                                                                                                | 293(2)                                                                                   |
| Wavelength [Å]                             | 0.71073                                                                         | 0.71073                                                                         | 1.54184                                                                                | 1.54184                                                                        | 1.54184                                                                                               | 1.54184                                                                                  |
| Crystal system                             | Orthorhombic                                                                    | Orthorhombic                                                                    | Monoclinic                                                                             | Orthorhombic                                                                   | Triclinic                                                                                             | Monoclinic                                                                               |
| Space group                                | <i>P</i> 2 <sub>1</sub> 2 <sub>1</sub> 2 <sub>1</sub>                           | <i>P</i> 2 <sub>1</sub> 2 <sub>1</sub> 2 <sub>1</sub>                           | <i>P</i> 2 <sub>1</sub>                                                                | <i>P</i> 2 <sub>1</sub> 2 <sub>1</sub> 2 <sub>1</sub>                          | <i>P</i> 1                                                                                            | <i>P</i> 2 <sub>1</sub>                                                                  |
| Unit cell dimensions [Å, °]                | a = 6.2773(2)<br>b = 12.2828(3)<br>c = 15.5226(3)<br>α = 90<br>β = 90<br>γ = 90 | a = 6.7731(2)<br>b = 14.3180(3)<br>c = 17.8700(4)<br>α = 90<br>β = 90<br>γ = 90 | a = 7.2300(6)<br>b = 16.1009(8)<br>c = 8.0712(6)<br>α = 90<br>β = 108.353(8)<br>γ = 90 | a = 5.5711(1)<br>b = 7.6596(1)<br>c = 35.1063(4)<br>α = 90<br>β = 90<br>γ = 90 | a = 5.0347(1)<br>b = 10.3457(2)<br>c = 14.3529(2)<br>α = 108.720(2)<br>β = 93.029(2)<br>γ = 97.024(2) | a = 5.0921(1)<br>b = 36.4707(4)<br>c = 7.54320(10)<br>α = 90<br>β = 109.463(1)<br>γ = 90 |
| Volume [Å <sup>3</sup> ]                   | 1196.84(5)                                                                      | 1732.98(7)                                                                      | 891.77(12)                                                                             | 1498.07(4)                                                                     | 699.37(2)                                                                                             | 1320.82(4)                                                                               |
| Z/Z'                                       | 4/1                                                                             | 4/1                                                                             | 2/1                                                                                    | 4/1                                                                            | 1/2                                                                                                   | 2/2                                                                                      |
| Density [g/cm <sup>3</sup> ]               | 1.655                                                                           | 1.504                                                                           | 1.480                                                                                  | 1.602                                                                          | 1.526                                                                                                 | 1.661                                                                                    |
| Absorption coefficient [mm <sup>-1</sup> ] | 0.154                                                                           | 0.130                                                                           | 1.045                                                                                  | 1.081                                                                          | 1.117                                                                                                 | 1.234                                                                                    |
| F(000)                                     | 624                                                                             | 824                                                                             | 416                                                                                    | 752                                                                            | 340                                                                                                   | 688                                                                                      |
| Crystal size [mm]                          | 0.40 x 0.20 x 0.20                                                              | 0.17 x 0.02 x 0.01                                                              | 0.05 x 0.05 x 0.010                                                                    | 0.10 x 0.04 x 0.02                                                             | 0.22 x 0.08 x 0.02                                                                                    | 0.13 x 0.05 x 0.01                                                                       |
| Theta range for data collection [°]        | 3.105 to 27.497                                                                 | 1.823 to 27.498                                                                 | 5.495 to 66.965                                                                        | 2.517 to 69.949                                                                | 3.267 to 71.963                                                                                       | 2.423 to 69.000                                                                          |
| Index ranges                               | -8<=h<=8<br>-15<=k<=15<br>-20<=l<=20                                            | -8<=h<=8<br>-18<=k<=18<br>-23<=l<=23                                            | -8<=h<=8<br>-19<=k<=18<br>-9<=l<=9                                                     | -6<=h<=6<br>-7<=k<=9<br>-42<=l<=42                                             | -5<=h<=6<br>-12<=k<=12<br>-17<=l<=17                                                                  | -6<=h<=6<br>-44<=k<=44<br>-8<=l<=9                                                       |
| Reflections collected                      | 58263                                                                           | 63253                                                                           | 30224                                                                                  | 14377                                                                          | 55829                                                                                                 | 34683                                                                                    |
| Independent reflections                    | 2733<br>[R(int) = 0.0627]                                                       | 3981<br>[R(int) = 0.0712]                                                       | 3136<br>[R(int) = 0.3044]                                                              | 2841<br>[R(int) = 0.0262]                                                      | 5297<br>[R(int) = 0.0427]                                                                             | 4856<br>[R(int) = 0.0431]                                                                |

|                                                     |                               |                               |                             |                               |                               |                               |
|-----------------------------------------------------|-------------------------------|-------------------------------|-----------------------------|-------------------------------|-------------------------------|-------------------------------|
| Completeness [%]                                    | 99.1                          | 99.8                          | 99.9                        | 99.8                          | 99.8                          | 99.4                          |
| Data / restraints / parameters                      | 2733 / 7 / 223                | 3981 / 10 / 274               | 3136 / 9 / 254              | 2841 / 3 / 269                | 5297 / 26 / 476               | 4856 / 14 / 470               |
| Goodness-of-fit on $F^2$                            | 1.066                         | 1.025                         | 1.031                       | 1.084                         | 1.066                         | 1.090                         |
| Final R indices<br>[ $I > 2\sigma(I)$ ]             | R1 = 0.0315<br>wR2 = 0.0767   | R1 = 0.0309<br>wR2 = 0.0771   | R1 = 0.0742<br>wR2 = 0.1530 | R1 = 0.0300<br>wR2 = 0.0760   | R1 = 0.0294<br>wR2 = 0.0808   | R1 = 0.0362<br>wR2 = 0.0922   |
| R indices (all data)                                | R1 = 0.0367<br>wR2 = 0.0805   | R1 = 0.0352<br>wR2 = 0.0792   | R1 = 0.1504<br>wR2 = 0.1966 | R1 = 0.0311<br>wR2 = 0.0770   | R1 = 0.0300<br>wR2 = 0.0813   | R1 = 0.0377<br>wR2 = 0.0932   |
| Absolute structure parameter                        | 0.1(5)                        | -0.5(4)                       | 0.0(5)                      | -0.11(6)                      | -0.01(7)                      | -0.05(7)                      |
| Largest diff. peak and hole [ $e/\text{\AA}^{-3}$ ] | 0.175 and -0.166<br>rms 0.044 | 0.320 and -0.188<br>rms 0.042 | 0.529 and -0.250            | 0.158 and -0.230<br>rms 0.037 | 0.343 and -0.256<br>rms 0.042 | 0.451 and -0.172<br>rms 0.039 |

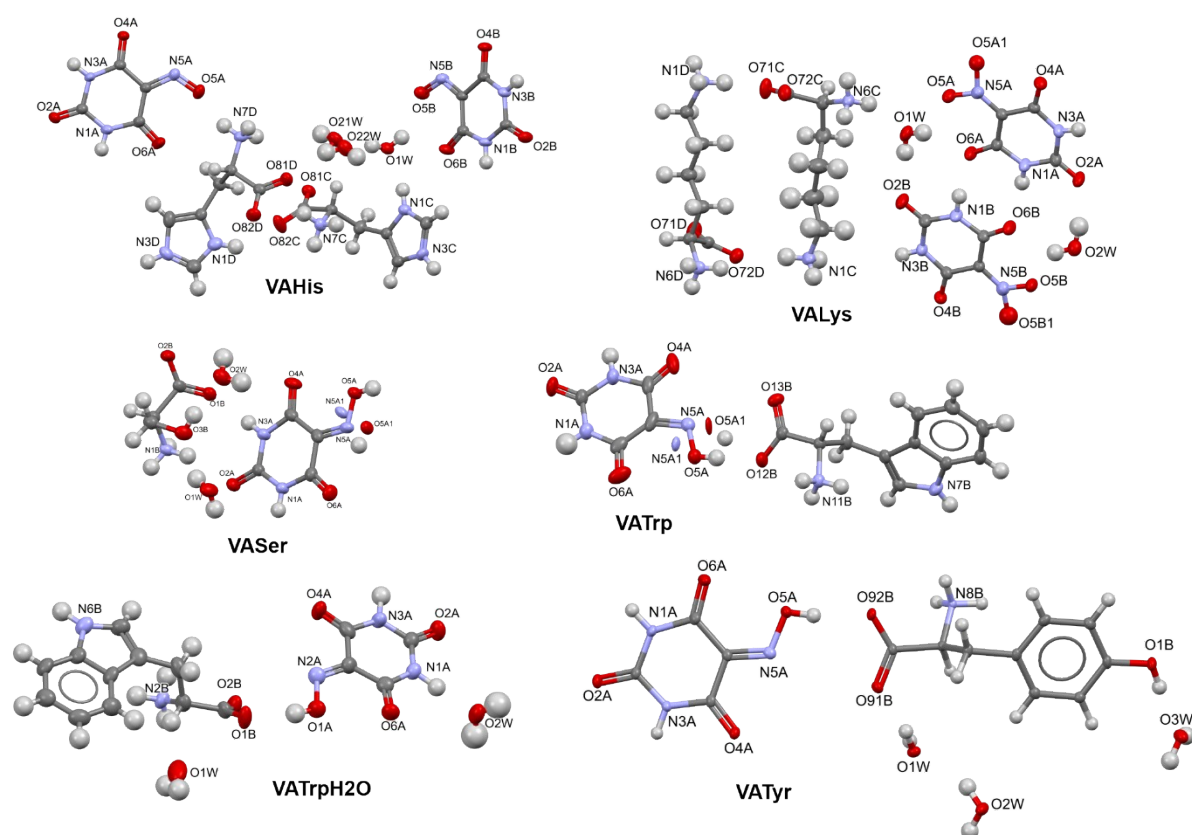

**Fig. S3** Asymmetric units of the violurate salts with amino acids. Atomic electron density is represented by ellipsoids at 50% probability. Labels are provided for the non-carbon and non-hydrogen atoms.

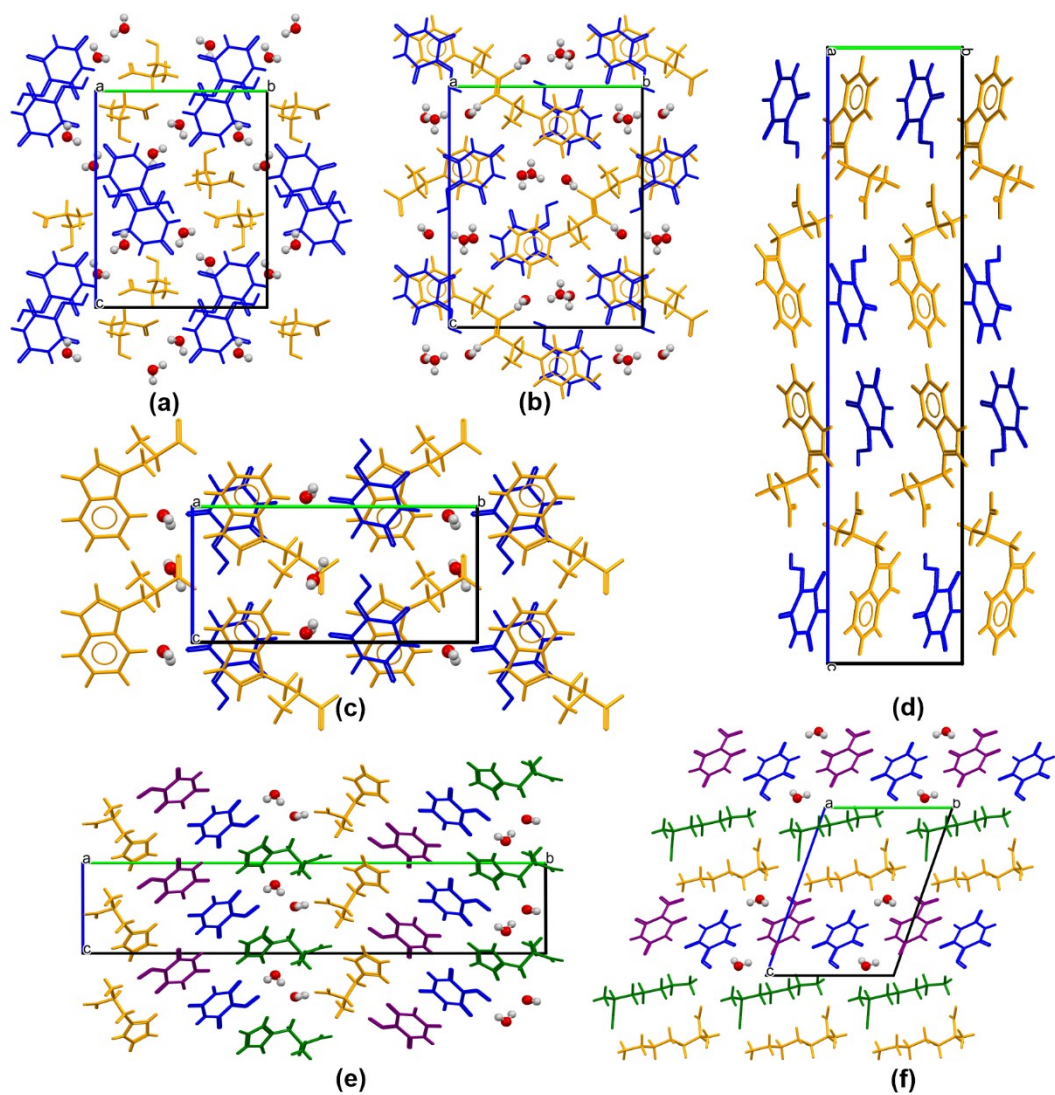

**Fig. S4** Packing of the structural components viewed along [100] direction in a) VASer, b) VATyr, (c) VATrp, (d) VATrp\*, (e) VAHis and (f) VALys. Symmetry equivalent molecules/ions were marked in the same colour.

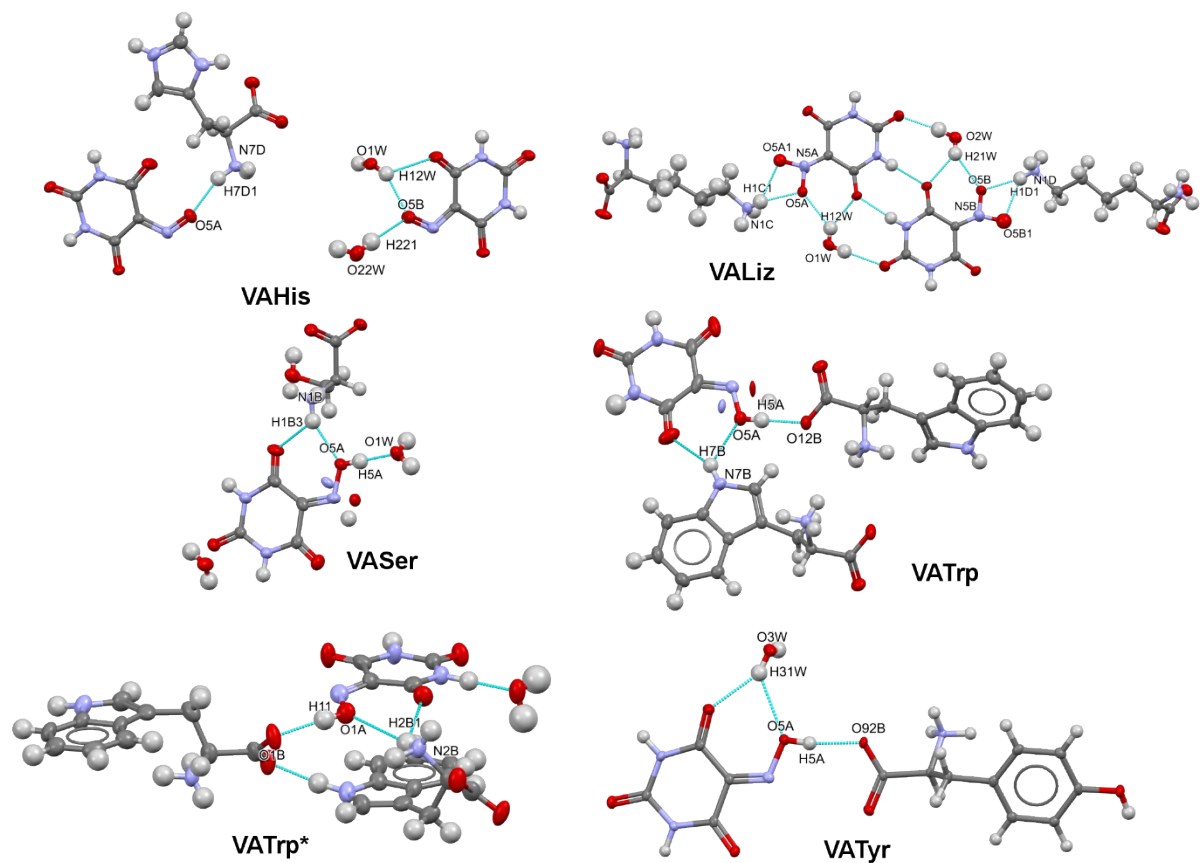

**Fig. S5** Hydrogen bonds around each oxime group in the studied crystals.

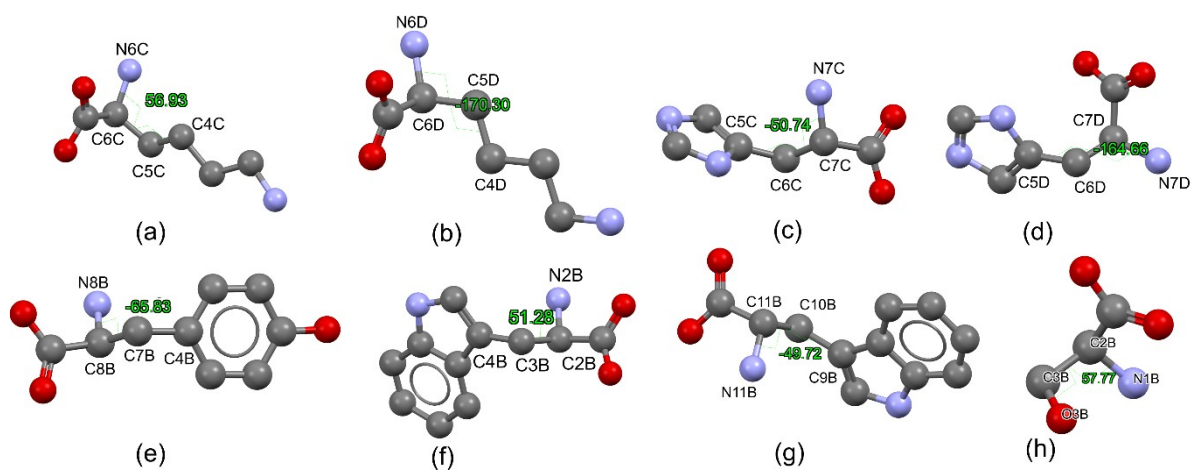

**Fig. S6** Conformations of a) C-cation of L-Lys in VALys; b) D-cation of L-Lys in VALys; c) C-cation of L-His in VAHis; d) D-cation of L-His in VAHis; e) L-Tyr in VATyr; f) L-Trp in VATrp\*; and g) L-Trp in VATrp h) L-Ser in VASer crystal structures.

**Table S3** Geometry of hydrogen bonds found in VASer, VATyr, VATrp, VALys and VAHis crystal structures.

|                                                                                                                                                                  | D-H [Å] | H...A [Å] | D...A [Å] | D-H...A [°] |
|------------------------------------------------------------------------------------------------------------------------------------------------------------------|---------|-----------|-----------|-------------|
| <b>VATyr, T=100K</b>                                                                                                                                             |         |           |           |             |
| N1A-H1A...O2W <sup>(i)</sup>                                                                                                                                     | 0.88(1) | 2.02(2)   | 2.819(2)  | 151(2)      |
| N3A-H3A...O1W <sup>(ii)</sup>                                                                                                                                    | 0.88(1) | 1.92(1)   | 2.796(2)  | 172(2)      |
| O5A-H5A...O92B                                                                                                                                                   | 0.84(1) | 1.78(2)   | 2.615(2)  | 171(3)      |
| O1B-H1B...O3W                                                                                                                                                    | 0.84(1) | 1.82(1)   | 2.653(2)  | 175(3)      |
| C2B-H2B...O6A <sup>(iii)</sup>                                                                                                                                   | 0.95    | 2.50      | 3.428(2)  | 166         |
| C8B-H8B...N5A <sup>(iv)</sup>                                                                                                                                    | 1.00    | 2.69      | 3.396(3)  | 128         |
| N8B-H8B1...O91B <sup>(iv)</sup>                                                                                                                                  | 0.91    | 2.00      | 2.815(2)  | 148         |
| N8B-H8B2...O1B <sup>(v)</sup>                                                                                                                                    | 0.91    | 2.09      | 2.940(2)  | 154         |
| N8B-H8B3...O4A <sup>(iv)</sup>                                                                                                                                   | 0.91    | 1.94      | 2.829(2)  | 165         |
| O1W-H11W...O91B                                                                                                                                                  | 0.84(1) | 1.88(1)   | 2.705(2)  | 169(3)      |
| O1W-H12W...O92B <sup>(iv)</sup>                                                                                                                                  | 0.83(1) | 2.04(1)   | 2.849(2)  | 166(3)      |
| O2W-H21W...O2A <sup>(iii)</sup>                                                                                                                                  | 0.84(1) | 2.48(3)   | 2.986(2)  | 120(2)      |
| O2W-H21W...O4A <sup>(vi)</sup>                                                                                                                                   | 0.84(1) | 2.11(2)   | 2.912(2)  | 158(3)      |
| O2W-H22W...O1W                                                                                                                                                   | 0.84(1) | 2.00(2)   | 2.801(2)  | 158(3)      |
| O3W-H31W...O5A <sup>(iii)</sup>                                                                                                                                  | 0.83(1) | 2.35(2)   | 2.993(2)  | 135(2)      |
| O3W-H31W...O6A <sup>(iii)</sup>                                                                                                                                  | 0.83(1) | 2.05(2)   | 2.803(2)  | 150(3)      |
| O3W-H32W...O2W <sup>(vii)</sup>                                                                                                                                  | 0.83(1) | 2.02(1)   | 2.850(3)  | 173(3)      |
| (i) x, y+1, z; (ii) -x+1, y+1/2, -z+1/2; (iii) x, y-1, z; (iv) x+1/2, -y+3/2, -z+1; (v) -x+1, y+1/2, -z+3/2; (vi) -x+1, y-1/2, -z+1/2; (vii) x+1/2, -y+1/2, -z+1 |         |           |           |             |
| <b>VASer, T=298K</b>                                                                                                                                             |         |           |           |             |
| N1A-H1A...O2B <sup>(i)</sup>                                                                                                                                     | 0.86(1) | 1.93(1)   | 2.788(2)  | 173(2)      |
| N3A-H3A...O1B                                                                                                                                                    | 0.86(1) | 2.00(1)   | 2.851(2)  | 172(3)      |
| O5A-H5A...O1W <sup>(ii)</sup>                                                                                                                                    | 0.82    | 1.64      | 2.458(4)  | 175         |
| O5A1-H5A1...O6A                                                                                                                                                  | 0.82    | 2.18      | 2.841(4)  | 138         |
| O5A1-H5A1...O2W <sup>(ii)</sup>                                                                                                                                  | 0.82    | 2.29      | 2.912(5)  | 133         |
| C2B-H2B...O1B <sup>(iii)</sup>                                                                                                                                   | 0.98    | 2.49      | 3.432(3)  | 162         |
| N1B-H1B1...O2B <sup>(iv)</sup>                                                                                                                                   | 0.89    | 2.01      | 2.874(3)  | 162         |
| N1B-H1B2...O2A                                                                                                                                                   | 0.89    | 2.09      | 2.948(2)  | 161         |
| N1B-H1B3...O4A <sup>(i)</sup>                                                                                                                                    | 0.89    | 2.23      | 2.838(2)  | 125         |
| N1B-H1B3...O6A <sup>(v)</sup>                                                                                                                                    | 0.89    | 2.61      | 3.041(3)  | 111         |
| N1B-H1B3...O5A <sup>(i)</sup>                                                                                                                                    | 0.89    | 2.04      | 2.842(4)  | 150         |

|                                  |         |         |          |        |
|----------------------------------|---------|---------|----------|--------|
| N1B-H1B3...N5A1 <sup>(i)</sup>   | 0.89    | 2.51    | 3.386(8) | 169    |
| O3B-H7B...O2W                    | 0.82(1) | 1.86(1) | 2.670(3) | 173(3) |
| O1W-H11W...O1B <sup>(i)</sup>    | 0.83(1) | 1.98(2) | 2.767(2) | 158(3) |
| O1W-H12W...O4A <sup>(i)</sup>    | 0.82(2) | 2.65(3) | 3.172(3) | 123(3) |
| O1W-H12W...O3B                   | 0.82(2) | 2.01(2) | 2.750(2) | 150(3) |
| O2W-H21W...O2A <sup>(vi)</sup>   | 0.82(1) | 2.14(1) | 2.906(3) | 157(3) |
| O2W-H22W...O6A <sup>(vii)</sup>  | 0.82(1) | 2.10(2) | 2.880(3) | 159(3) |
| O2W-H22W...O5A1 <sup>(vii)</sup> | 0.82(1) | 2.40(3) | 2.912(5) | 121(3) |

(i)  $-x, y-1/2, -z+1/2$ ; (ii)  $x+1/2, -y+1/2, -z+1$ ; (iii)  $x-1/2, -y+1/2, -z$ ; (iv)  $x+1/2, -y+1/2, -z$ ; (v)  $-x+1/2, -y, z-1/2$ ; (vi)  $-x, y+1/2, -z+1/2$ ; (vii)  $x-1/2, -y+1/2, -z+1$

---

**VATrp, T=298K**

|                                  |         |         |          |        |
|----------------------------------|---------|---------|----------|--------|
| N1A-H1A...O2A <sup>(i)</sup>     | 0.86(1) | 2.02(1) | 2.881(3) | 174(3) |
| O5A-H5A...O12B                   | 0.82    | 1.72    | 2.543(4) | 177    |
| O5A1-H5A1...O12B                 | 0.82    | 1.69    | 2.504(8) | 173    |
| O5A1-H5A1...O13B                 | 0.82    | 2.44    | 2.854(8) | 112    |
| N7B-H7B...O5A <sup>(ii)</sup>    | 0.86(1) | 2.37(2) | 2.966(3) | 127(2) |
| N7B-H7B...N5A19 <sup>(ii)</sup>  | 0.86(1) | 2.57(2) | 3.324(9) | 146(2) |
| N7B-H7B...O6A <sup>(ii)</sup>    | 0.86(1) | 2.13(2) | 2.923(3) | 153(2) |
| C8B-H8B...O5A <sup>(ii)</sup>    | 0.99(3) | 2.62(3) | 3.153(4) | 114(2) |
| C8B-H8B...O12B <sup>(ii)</sup>   | 0.99(3) | 2.44(3) | 3.429(3) | 174(2) |
| C10B-H10B...O5A <sup>(iii)</sup> | 0.97    | 2.62    | 3.272(3) | 125    |
| C11B-H11B...O5A1 <sup>(iv)</sup> | 0.98    | 2.57    | 3.131(5) | 117    |
| N11B-H11D...O4A <sup>(iv)</sup>  | 0.89    | 2.00    | 2.880(2) | 168    |
| N11B-H11A...O13B <sup>(iv)</sup> | 0.89    | 2.06    | 2.944(2) | 172    |
| N11B-H11C...O13B <sup>(v)</sup>  | 0.89    | 2.13    | 2.938(2) | 151    |

(i)  $x+1/2, -y+1/2, -z+1$ ; (ii)  $-x+2, y+1/2, -z+3/2$ ; (iii)  $-x+1, y+1/2, -z+3/2$ ; (iv)  $-x+1, y-1/2, -z+3/2$ ; (v)  $x+1, y, z$

---

**VALys, T=100K**

|                                  |         |         |           |        |
|----------------------------------|---------|---------|-----------|--------|
| N1A-H1A...O6B                    | 0.87(1) | 1.95(1) | 2.817(3)  | 177(3) |
| N3A-H3A...O4B <sup>(i)</sup>     | 0.87(1) | 1.98(1) | 2.849(2)  | 175(3) |
| N1B-H1B...O6A                    | 0.87(1) | 1.95(2) | 2.816(2)  | 173(3) |
| N3B-H3B...O4A <sup>(ii)</sup>    | 0.87(1) | 1.98(1) | 2.843(3)  | 176(3) |
| N1C-H1C1...N5A <sup>(iii)</sup>  | 0.90(1) | 2.61(2) | 3.416(3)  | 149(3) |
| N1C-H1C1...O5A <sup>(iii)</sup>  | 0.90(1) | 1.98(2) | 2.802(3)  | 152(3) |
| N1C-H1C1...O5A' <sup>(iii)</sup> | 0.90(1) | 2.14(3) | 2.789(13) | 128(3) |



|                                  |         |         |           |        |
|----------------------------------|---------|---------|-----------|--------|
| N1C-H1C2...O72D                  | 0.89(1) | 2.00(2) | 2.870(3)  | 164(3) |
| N1C-H1C2...O71D <sup>(iv)</sup>  | 0.89(1) | 2.44(3) | 2.876(3)  | 110(2) |
| N1C-H1C3...O4A <sup>(ii)</sup>   | 0.90(1) | 2.20(2) | 2.874(2)  | 131(2) |
| N1C-H1C3...N5A <sup>(ii)</sup>   | 0.90(1) | 2.34(2) | 3.160(3)  | 151(3) |
| N1C-H1C3...O5A' <sup>(ii)</sup>  | 0.90(1) | 2.13(2) | 2.938(14) | 148(3) |
| C2C-H2C1...O5A' <sup>(iii)</sup> | 0.99    | 2.37    | 2.957(10) | 118    |
| C2C'-H2C4...O72D                 | 0.99    | 2.61    | 3.21(2)   | 119    |
| C6C-H6C...O5A <sup>(v)</sup>     | 1.00    | 2.53    | 3.392(3)  | 144    |
| N6C-H6C1...O71C <sup>(iv)</sup>  | 0.90(1) | 1.90(2) | 2.791(3)  | 172(3) |
| N6C-H6C2...O1W                   | 0.90(1) | 1.84(2) | 2.736(2)  | 171(3) |
| N6C-H6C3...O72D <sup>(vi)</sup>  | 0.90(1) | 1.95(2) | 2.803(2)  | 157(3) |
| N1D-H1D1...N5B <sup>(vii)</sup>  | 0.90(1) | 2.66(2) | 3.494(3)  | 155(2) |
| N1D-H1D1...O5B <sup>(vii)</sup>  | 0.90(1) | 1.90(2) | 2.789(3)  | 170(3) |
| N1D-H1D2...O4B <sup>(viii)</sup> | 0.92(1) | 2.45(3) | 2.952(2)  | 115(2) |
| N1D-H1D2...N5B <sup>(viii)</sup> | 0.92(1) | 2.18(2) | 3.042(3)  | 156(3) |
| N1D-H1D3...O71C                  | 0.92(1) | 1.88(2) | 2.763(2)  | 161(3) |
| C2D-H2D2...O2A <sup>(ix)</sup>   | 0.99    | 2.60    | 3.496(3)  | 150    |
| N6D-H6D1...O72C <sup>(iii)</sup> | 0.91(1) | 1.92(2) | 2.804(2)  | 164(3) |
| N6D-H6D2...O71D <sup>(iv)</sup>  | 0.91(1) | 1.83(2) | 2.735(3)  | 171(3) |
| N6D-H6D3...O5B <sup>(x)</sup>    | 0.92(1) | 2.60(3) | 3.044(2)  | 110(2) |
| N6D-H6D3...O2W <sup>(x)</sup>    | 0.92(1) | 1.89(2) | 2.802(3)  | 173(3) |
| O1W-H1W1...O5A                   | 0.85(1) | 2.19(2) | 2.869(3)  | 137(3) |
| O1W-H1W1...O6A                   | 0.85(1) | 2.03(2) | 2.758(2)  | 144(3) |
| O1W-H1W2...O2B                   | 0.84(1) | 2.03(2) | 2.870(2)  | 175(3) |
| O2W-H2W1...O5B                   | 0.84(1) | 2.27(3) | 2.836(2)  | 125(3) |
| O2W-H2W1...O6B                   | 0.84(1) | 1.99(2) | 2.776(2)  | 156(3) |
| O2W-H2W2...O2A                   | 0.84(1) | 2.06(2) | 2.900(2)  | 177(3) |

(i) x-1, y+1, z; (ii) x+1, y-1, z; (iii) x, y-1, z; (iv) x-1, y, z; (v) x+1, y, z; (vi) x, y+1, z; (vii) x+2, y, z-1; (viii) x+1, y, z-1; (ix) x+2, y-1, z-1; (x) x+1, y-1, z-1

---

**VAHis, T=293K**

|                                |         |         |          |        |
|--------------------------------|---------|---------|----------|--------|
| N1A-H1A...O2B <sup>(i)</sup>   | 0.86(2) | 2.05(2) | 2.912(4) | 175(4) |
| N3A-H3A...O4B <sup>(ii)</sup>  | 0.86(2) | 2.01(2) | 2.859(4) | 171(4) |
| N1B-H1B...O2A <sup>(iii)</sup> | 0.86(2) | 2.06(1) | 2.916(4) | 177(4) |
| N1C-H1C...O6B                  | 0.86(2) | 2.64(4) | 3.158(4) | 120(3) |
| N1C-H1C...O1W                  | 0.86(2) | 1.93(2) | 2.769(4) | 165(4) |

|                                    |         |         |           |         |
|------------------------------------|---------|---------|-----------|---------|
| C2C-H2C...O2A <sup>(iii)</sup>     | 0.93    | 2.39    | 3.240(4)  | 152     |
| N3C-H3C...O4B <sup>(iv)</sup>      | 0.86(2) | 1.99(2) | 2.851(4)  | 171(4)  |
| N3C-H3C...N5B <sup>(iv)</sup>      | 0.86(2) | 2.55(4) | 3.050(4)  | 118(4)  |
| C4C-H4C...N5B <sup>(iv)</sup>      | 0.93    | 2.52    | 3.031(5)  | 115     |
| C4C-H4C...O5B <sup>(iv)</sup>      | 0.93    | 2.55    | 3.348(4)  | 144     |
| C4C-H4C...O22W <sup>(v)</sup>      | 0.93    | 2.38    | 3.188(14) | 146     |
| C6C-H6C1...O21W <sup>(v)</sup>     | 0.97    | 2.37    | 3.296(8)  | 161     |
| C7C-H7C...O21W                     | 1.01(4) | 2.56(4) | 3.508(7)  | 155(3)  |
| C7C-H7C...O22W                     | 1.01(4) | 2.67(4) | 3.547(12) | 145(3)  |
| N7C-H7C3...O1W <sup>(vi)</sup>     | 0.89    | 2.04    | 2.870(4)  | 155     |
| N7C-H7C1...O81D                    | 0.89    | 1.94    | 2.755(4)  | 151     |
| N7C-H7C2...O81C <sup>(vi)</sup>    | 0.89    | 2.05    | 2.803(4)  | 142     |
| N1D-H1D...O81C <sup>(vi)</sup>     | 0.87(2) | 2.14(3) | 2.938(4)  | 153(4)  |
| C2D-H2D...N5A <sup>(iv)</sup>      | 0.93    | 2.36    | 2.906(5)  | 117     |
| C2D-H2D...O5A <sup>(iv)</sup>      | 0.93    | 2.32    | 3.152(5)  | 148     |
| C2D-H2D...O82C <sup>(vi)</sup>     | 0.93    | 2.65    | 3.193(5)  | 118     |
| N3D-H3D...O4A <sup>(iv)</sup>      | 0.86(2) | 2.11(2) | 2.972(4)  | 178(5)  |
| C4D-H4D...O6A                      | 0.93    | 2.58    | 3.235(5)  | 128     |
| C6D-H6D1...O6A                     | 0.97    | 2.34    | 3.090(5)  | 134     |
| C6D-H6D2...O82C                    | 0.97    | 2.66    | 3.559(5)  | 155     |
| C7D-H7D...O5A <sup>(vi)</sup>      | 0.94(4) | 2.41(4) | 3.337(4)  | 167(3)  |
| N7D-H7D1...O5A                     | 0.89    | 1.98    | 2.830(4)  | 160.3   |
| N7D-H7D2...O81C <sup>(vii)</sup>   | 0.89    | 1.90    | 2.790(4)  | 174     |
| N7D-H7D3...O82D <sup>(viii)</sup>  | 0.89    | 1.89    | 2.768(4)  | 171     |
| O1W-H11W...O21W                    | 0.88(5) | 1.86(5) | 2.733(8)  | 171(5)  |
| O1W-H11W...O22W                    | 0.88(5) | 1.88(5) | 2.734(13) | 165(5)  |
| O1W-H12W...O5B                     | 0.78(4) | 2.06(5) | 2.763(4)  | 150(5)  |
| O1W-H12W...O6B                     | 0.78(4) | 2.27(5) | 2.833(4)  | 129(4)  |
| O21W-H211...O81D <sup>(viii)</sup> | 0.83(2) | 2.70(7) | 3.323(18) | 133(8)  |
| O21W-H211...O82D <sup>(viii)</sup> | 0.83(2) | 1.97(3) | 2.787(18) | 171(10) |
| O22W-H221...O5B <sup>(vi)</sup>    | 0.91(2) | 1.94(2) | 2.81(3)   | 159(14) |
| O21W-H222...O81D                   | 0.82(2) | 2.03(2) | 2.762(7)  | 149(3)  |
| O22W-H222...O81D                   | 0.82(2) | 2.03(2) | 2.805(11) | 156(3)  |

(i)  $-x+1, y+1/2, -z+1$ ; (ii)  $-x+3, y+1/2, -z+2$ ; (iii)  $-x+1, y-1/2, -z+1$ ; (iv)  $x-2, y, z-1$ ; (v)  $x-1, y, z-1$ ; (vi)  $x-1, y, z$ ; (vii)  $x, y, z+1$ ; (viii)

**Table S4** Geometry of  $\pi\cdots\pi$  and  $LP\cdots\pi$  in VATyr, VATrp and VAHis crystal structures.

| Interaction                                                                               | Cg...Cg distance [ $\text{\AA}$ ] <sup>[a]</sup> | $\gamma$ angle [ $^\circ$ ] <sup>[b]</sup> |
|-------------------------------------------------------------------------------------------|--------------------------------------------------|--------------------------------------------|
| <b><math>\pi(\text{double bond})\cdots\pi</math></b>                                      |                                                  |                                            |
| <b>VATyr</b>                                                                              |                                                  |                                            |
| Cg(C4A=O4A) $\cdots$ Cg(1)                                                                | 3.236                                            | 6.63                                       |
| Cg(1) [C1B-C2B-C3B-C4B-C5B-C6B]                                                           |                                                  |                                            |
| <b>VATrp</b>                                                                              |                                                  |                                            |
| Cg(C6A=O6A) $\cdots$ Cg(1)                                                                | 3.293                                            | 11.90                                      |
| Cg(C4A=O4A) $\cdots$ Cg(3)                                                                | 3.546                                            | 26.05                                      |
| Cg(C5A=N5A) $\cdots$ Cg(3)                                                                | 3.399                                            | 12.90                                      |
| Cg(1) [C1B-C2B-C3B-C4B-C5B-C6B]                                                           |                                                  |                                            |
| Cg(3) [C5B-C6B-N7B-C8B-C9B]                                                               |                                                  |                                            |
| <b>VATrp*</b>                                                                             |                                                  |                                            |
| Cg(C2A=O2A) $\cdots$ Cg(1)                                                                | 3.385                                            | 5.78                                       |
| Cg(1) [C7B-C8B-C9B-C10B-C11B-C12B]                                                        |                                                  |                                            |
| <b>VAHis</b>                                                                              |                                                  |                                            |
| Cg(C5A=N5A) $\cdots$ Cg(3)                                                                | 3.370                                            | 8.80                                       |
| Cg(C5B=N5B) $\cdots$ Cg(4)                                                                | 3.451                                            | 7.62                                       |
| LP(O1W) $\cdots$ Cg(4)                                                                    | 3.386                                            | 89.95                                      |
| Cg(1) [N1A-C2A-N3A-C4A-C5A-C6A]                                                           |                                                  |                                            |
| Cg(2) [N1B-C2B-N3B-C4B-C5B-C6B]                                                           |                                                  |                                            |
| Cg(3) [N1D-C2D-N3D-C4D-C5D]                                                               |                                                  |                                            |
| Cg(4) [N1C-C2C-N3C-C4C-C5C]                                                               |                                                  |                                            |
| [a] perpendicular distance of Cg(x) to the Cg(y) ring best plane;                         |                                                  |                                            |
| [b] the angle between the Cg(x) $\cdots$ Cg(y) vector and normal to Cg(x) ring best plane |                                                  |                                            |

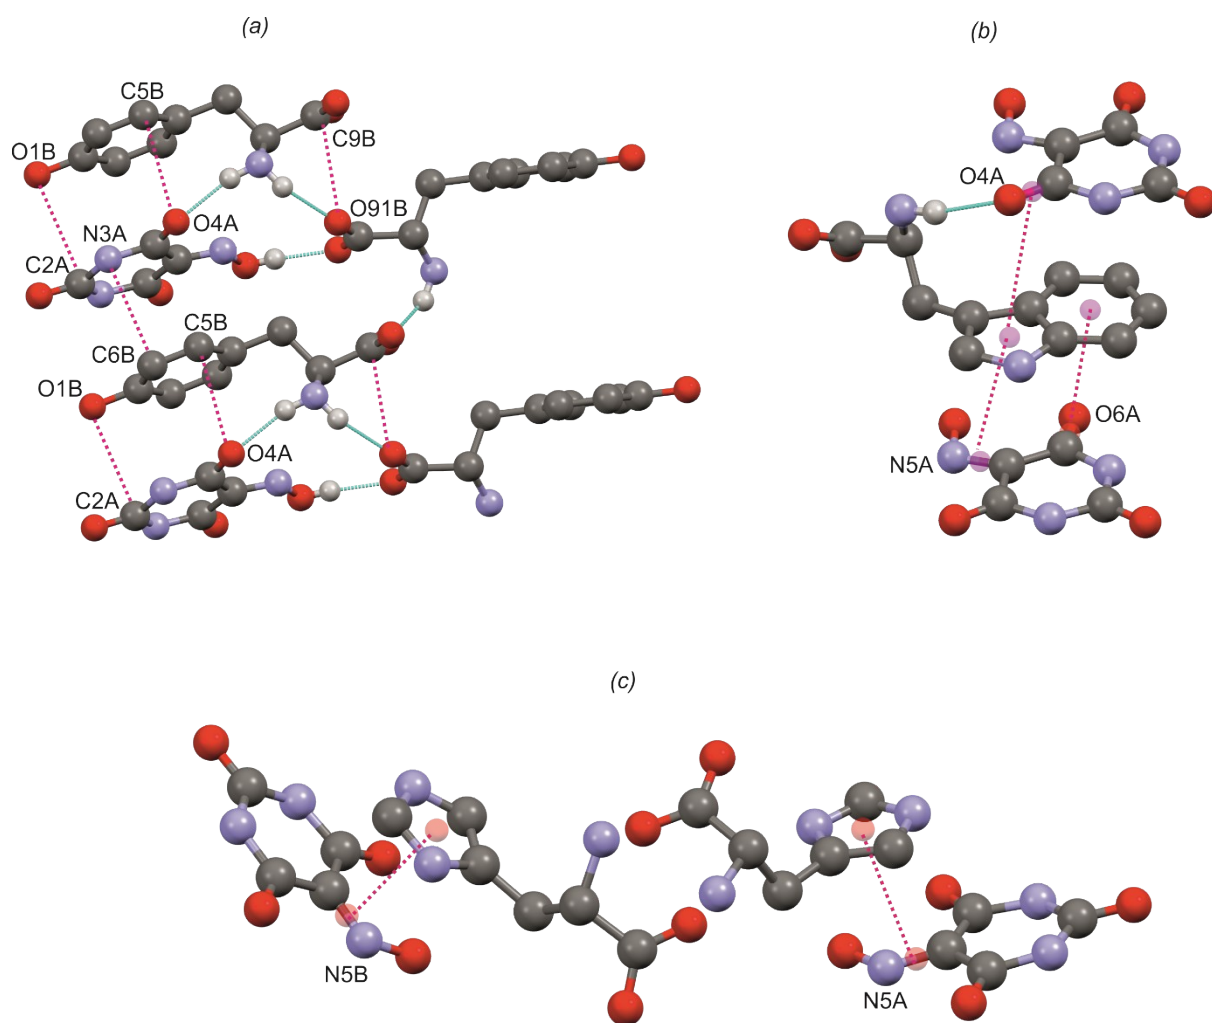

**Fig. S7** Visualization of  $\pi \cdots \pi$  interactions in a) VATyr, b) VATrp and c) VAHis crystal structures. Hydrogen atoms which do not participate in intermolecular interactions were omitted for clarity.

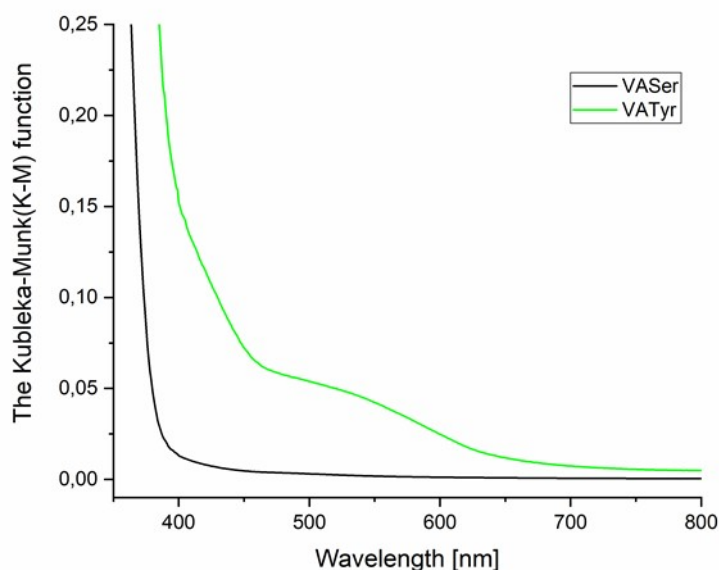

**Fig. S8** UV-Vis spectra for VATyr crystals (scale factor x5) compared with colorless VASer crystals.

#### **<sup>1</sup>H NMR spectroscopy:**

For a mixture of L-His and VA and for the salt V(L-His) in D<sub>2</sub>O, a decrease in the population with antiperiplanar conformation (*trans* for imidazole and carboxylic anion groups with dihedral angle  $\theta=180^\circ$ ) was observed<sup>12</sup>. At the same time an increase in the population with antiperiplanar conformation was observed (*trans* for imidazole and ammonium groups with dihedral angle  $\theta=180^\circ$ ). The <sup>1</sup>H NMR data for L-Arg in D<sub>2</sub>O indicated the presence of two set of signals with overlapping triplets of H<sub>a</sub> (3.25 ppm), H<sub>a</sub>' (3.24 ppm) and H<sub>e</sub> (3.117 ppm), H<sub>e</sub>' (3.113 ppm). Origin of these two sets may be connected with the occurrence of two tautomeric forms of guanidine group in solution<sup>13,14</sup> or two rotamers induced via formation of intramolecular hydrogen bond with guanidine nitrogen atom as donor and carboxylic oxygen atom as acceptor of proton<sup>15</sup>. The comparison of vicinal coupling constants <sup>3</sup>J for diastereotopic and H<sub>a</sub> protons with the data available in the literature confirmed the contribution of gauche conformation in L-Ser for mixture with VA and V(L-Ser) co-crystals dissolved in D<sub>2</sub>O<sup>16</sup>. Also the main population of amino acids rotamers with bulky side-chain group is that with antiperiplanar conformation (*trans* for aryl or hetaryl and carboxylic anion groups with dihedral angle  $\theta=180^\circ$ ) in mixtures VA with L-Trp or L-Tyr and dissolved co-crystal V(L-Trp)<sup>17,18</sup>. The values of coupling constant *J* are consistent with the data available in the literature.<sup>19</sup>

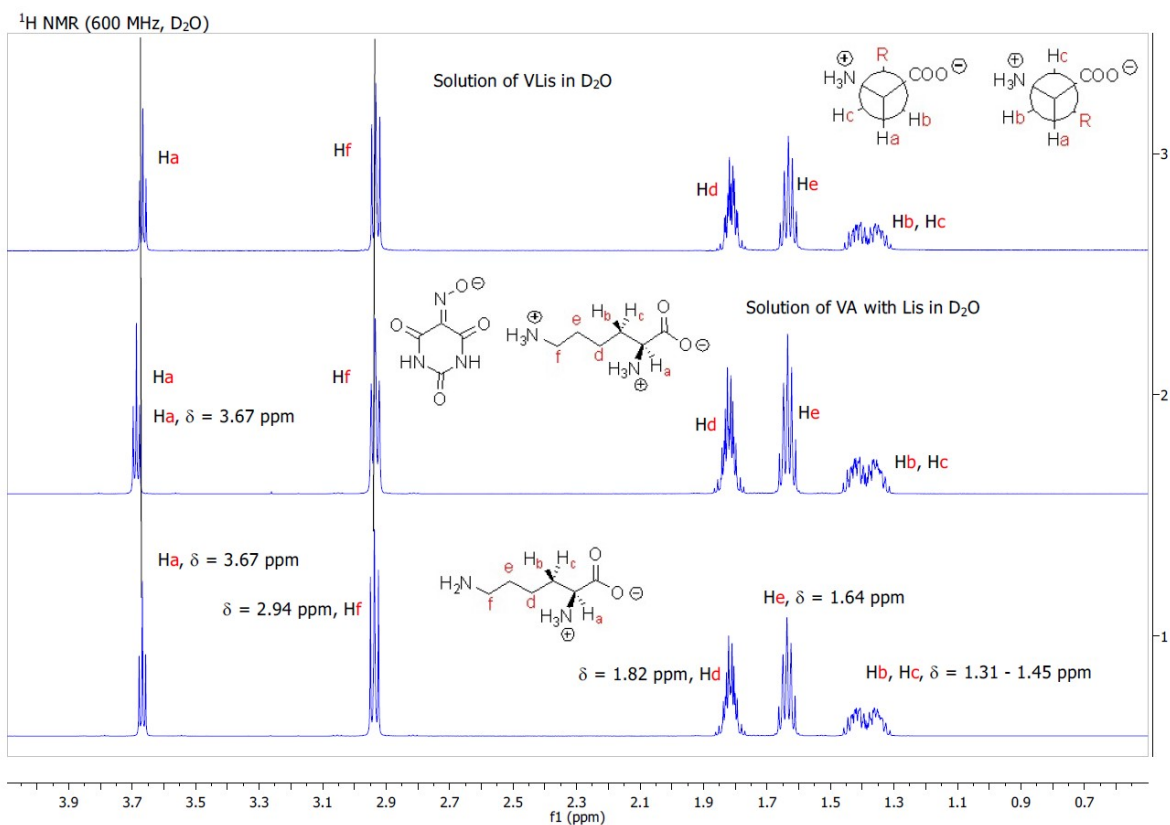

**Fig. S9** <sup>1</sup>H NMR spectra in D<sub>2</sub>O for VALys, a mixture of VA and L-Lys and for L-Lys.

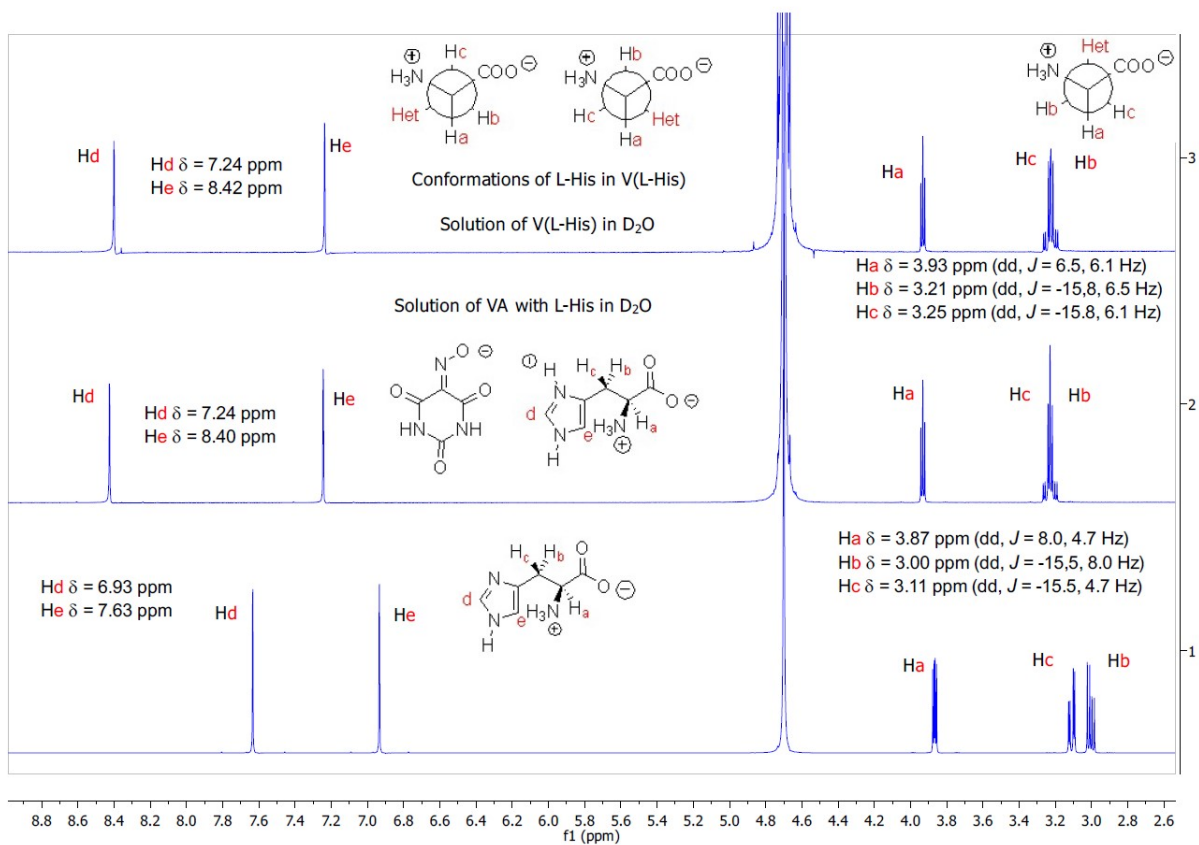

**Fig. S10** <sup>1</sup>H NMR spectra in D<sub>2</sub>O for VAHis, a mixture of VA and L-His and for L-His.

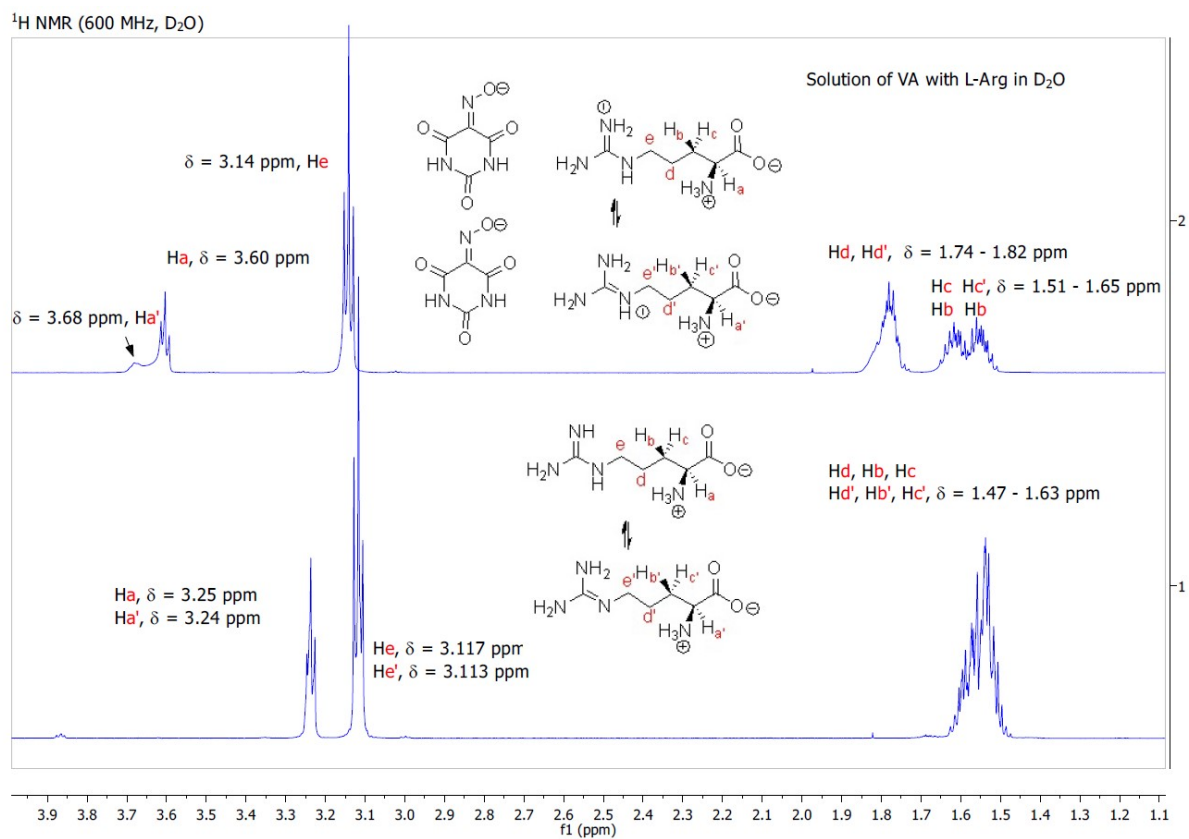

**Fig. S11** <sup>1</sup>H NMR spectra in D<sub>2</sub>O for a mixture of VA with L-Arg and for L-Arg.



$^1\text{H}$  NMR (600 MHz,  $\text{D}_2\text{O}$ )

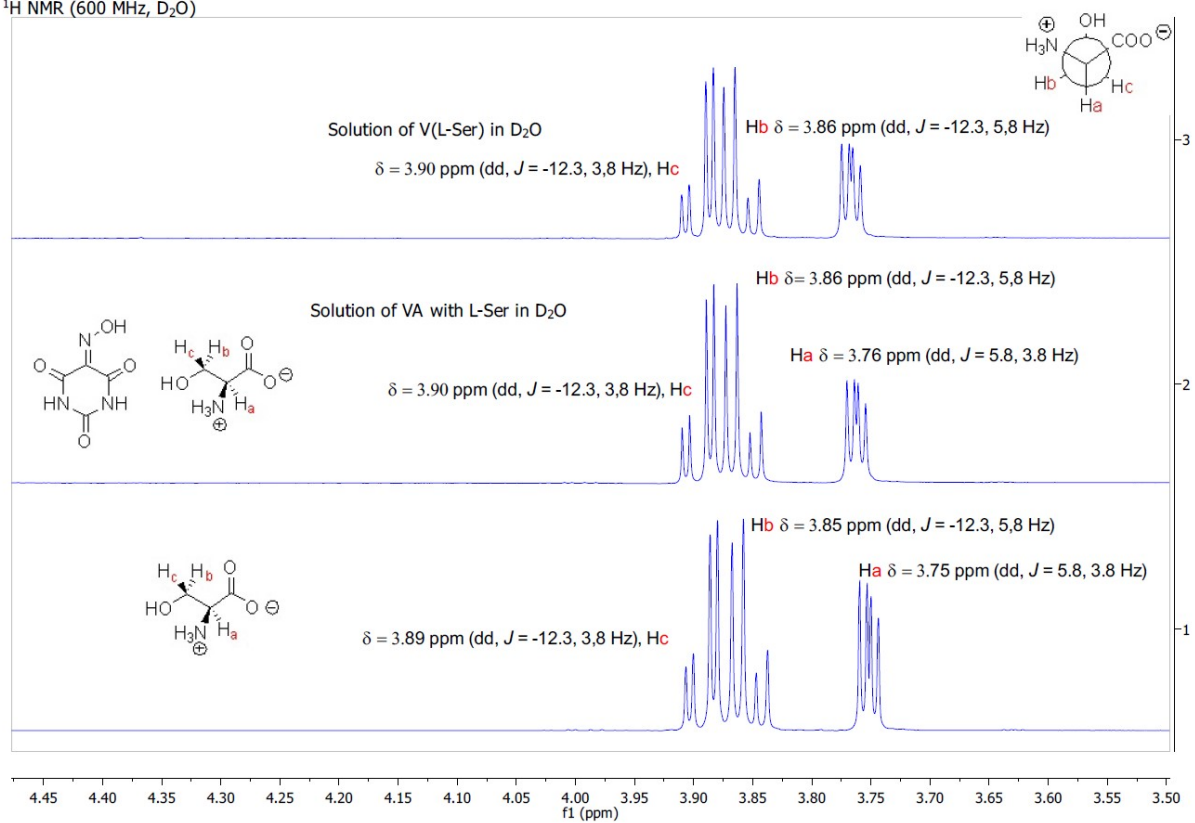

**Fig. S12**  $^1\text{H}$  NMR spectra in  $\text{D}_2\text{O}$  for: VASer, a mixture of VA and L-Ser and for L-Ser.

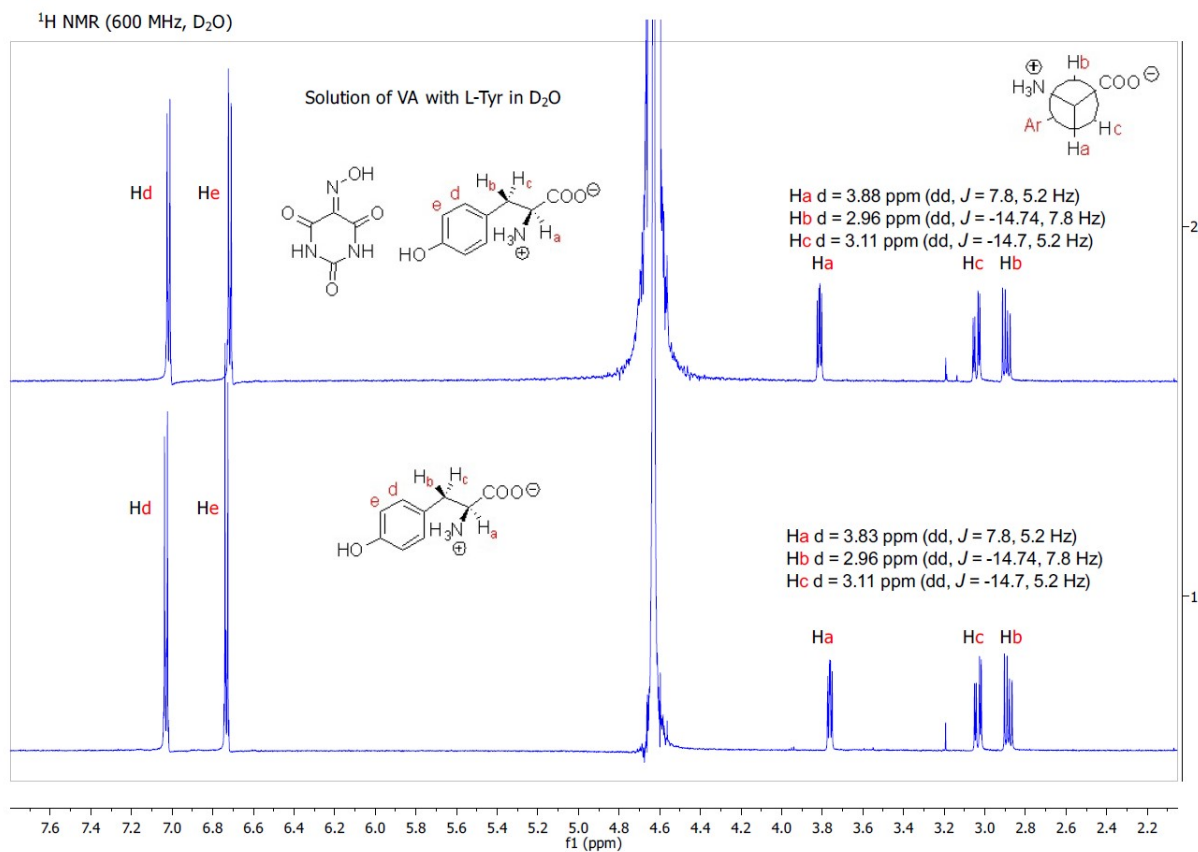

**Fig. S13** <sup>1</sup>H NMR spectra in D<sub>2</sub>O for a mixture of VA and L-Tyr and for L-Tyr.

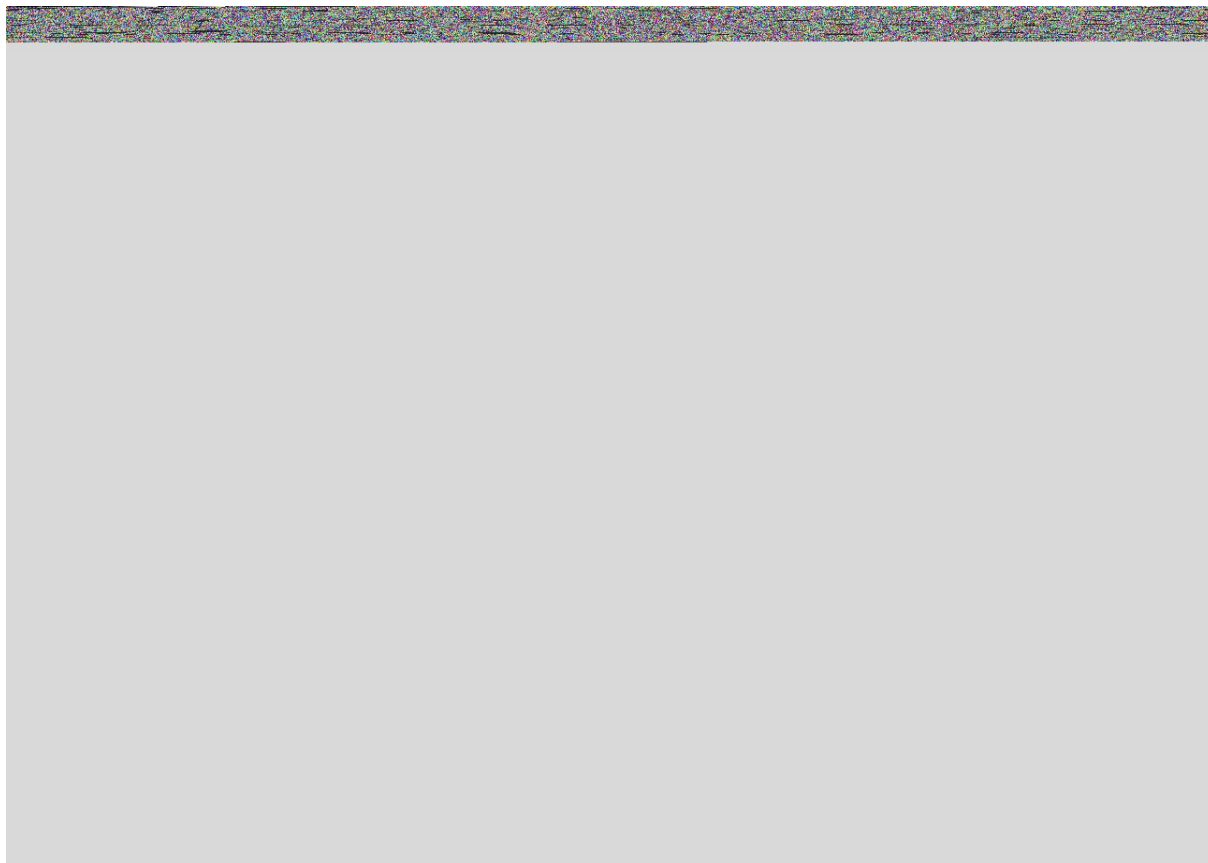

**Fig. S14**  $^1\text{H}$  NMR spectra in  $\text{D}_2\text{O}$  for: VATrp, a mixture of VA and L-Tryp and for L-Trp.

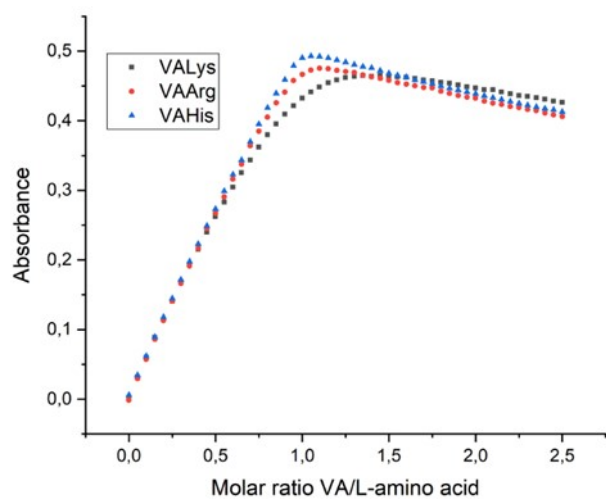

**Fig. S15** The titration curves for VAArg, VAllys and VAHis. The titrations of 2ml of 0.01M VA amino acid solutions were carried out using 20  $\mu\text{L}$  portions of 0.05M of VA.

**Determination limit of detection (LoD):**

The Limit of Detection (LoD) was determined using following equation (1)<sup>20</sup>:

$$LoD = (3 \cdot S)/b \tag{1}$$

Where  $S$  is the sum of the square of the vertical deviations from each data point to the fitting regression line, and  $b$  is the slope of calibration curve. Fig. S10-S12 shows calibration curves in the linear range for VAHis, VALys and VAArg salts obtained from titration experiments.

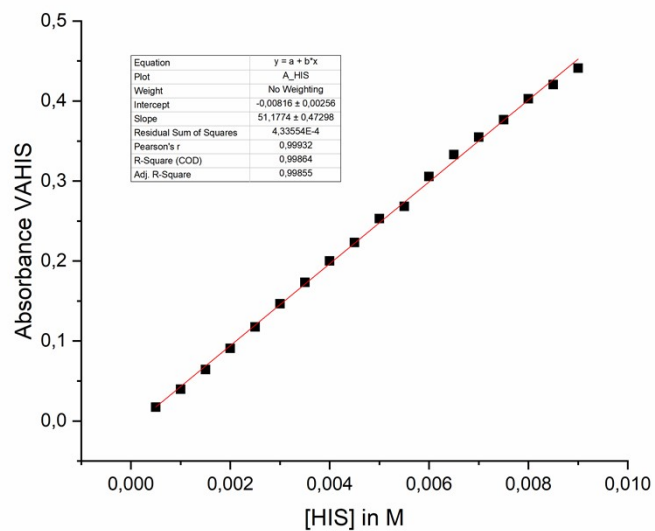

**Fig. S16** Calibration curve for VAHis salt.

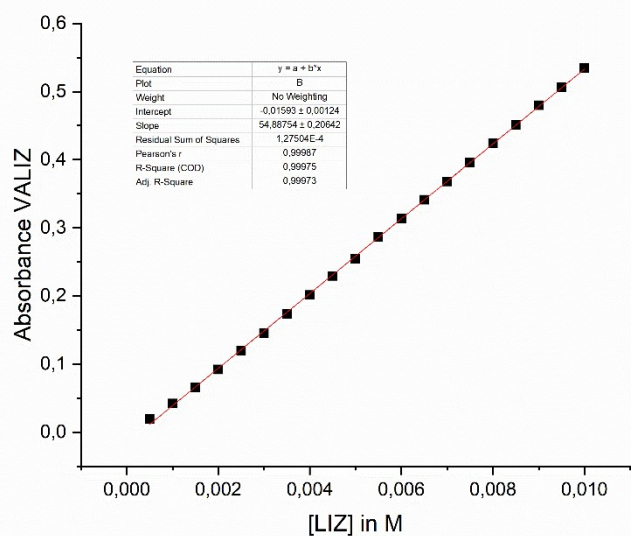

**Fig. S17** Calibration curve for VALys salt.

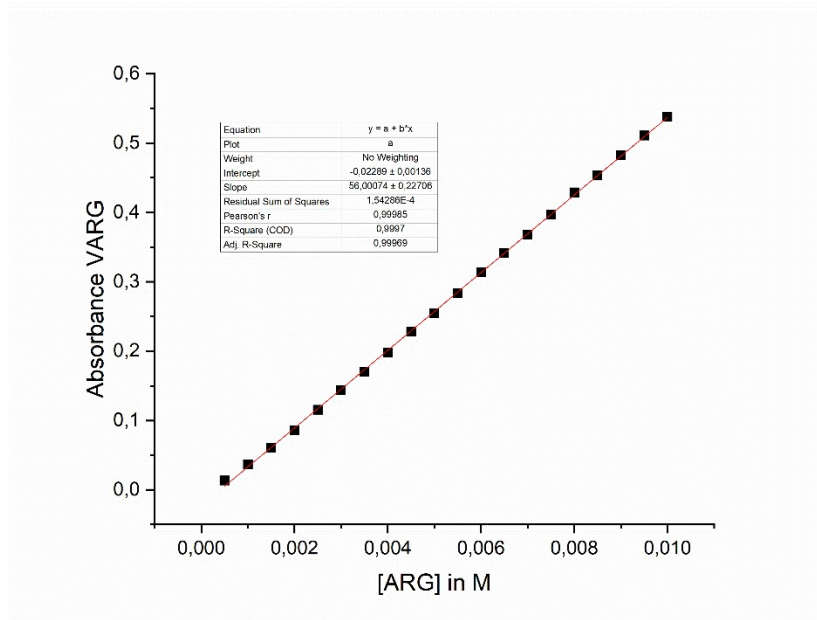

**Fig. S18** Calibration curve for VArg salt.

**Table S5** Topological analysis of BCPs for C-N and N-O bonds of oxime group in studied crystalline phases.  $\rho(r)$  – charge density (a.u.);  $\nabla^2\rho(r)$  – Laplacian of electron density (a.u.).

|                  | C-N             |           |                   | N-O             |           |                   |
|------------------|-----------------|-----------|-------------------|-----------------|-----------|-------------------|
|                  | Bond length [Å] | $\rho(r)$ | $\nabla^2\rho(r)$ | Bond length [Å] | $\rho(r)$ | $\nabla^2\rho(r)$ |
| <b>VHis (A)</b>  | 1.325           | 0.349     | -1.078            | 1.287           | 0.381     | -0.433            |
| <b>VHis (B)</b>  | 1.336           | 0.343     | -1.067            | 1.282           | 0.386     | -0.440            |
| <b>VALys (A)</b> | 1.328           | 0.348     | -1.080            | 1.291           | 0.373     | -0.395            |
| <b>VALys (B)</b> | 1.328           | 0.347     | -1.069            | 1.295           | 0.377     | -0.407            |
| <b>VATrp_A</b>   | 1.292           | 0.370     | -0.977            | 1.338           | 0.338     | -0.311            |
| <b>VATrp*</b>    | 1.291           | 0.370     | -0.965            | 1.336           | 0.339     | -0.313            |
| <b>VATyr</b>     | 1.285           | 0.375     | -0.950            | 1.354           | 0.325     | -0.266            |
| <b>VASer_A</b>   | 1.289           | 0.372     | -0.968            | 1.356           | 0.324     | -0.262            |
| <b>VASer_B*</b>  | 1.292           | 0.370     | -0.967            | 1.339           | 0.337     | -0.300            |

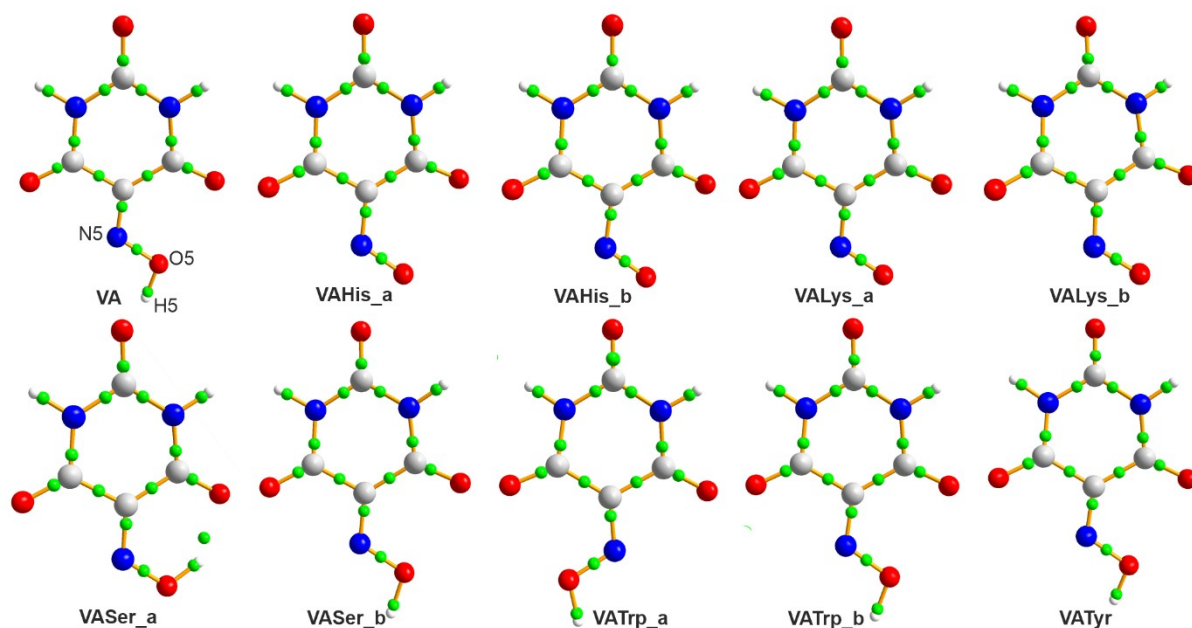

**Fig. S19** Molecular graphs for VA molecules and ions in the crystal structures of VA monohydrate (VA) and the respective salts and co-crystals with amino acids. BCPs are marked in green colour. VATrp\_b denotes VATrp\* crystal structure.

**Table S6** Selected hydrogen bonds involving oxime group in the examined structures.  $\rho(r)$  – charge density (a.u.);  $\nabla^2\rho(r)$  – Laplacian of electron density (a.u.); G, V– local kinetic, potential energy density (a.u.),  $E_{\text{int}}$  – interaction energy in kcal/mol estimated using Espinosa approximation.

|               |                          | $\rho(r)$ | $\nabla^2\rho(r)$ | G     | V      | $E_{\text{int}}$ |
|---------------|--------------------------|-----------|-------------------|-------|--------|------------------|
| <b>VASerA</b> | H5A1...O6A               | 0.054     | 0.143             | 0.047 | -0.058 | -18.321          |
|               | H5A1...O2W <sup>i</sup>  | 0.017     | 0.078             | 0.016 | -0.013 | -4.194           |
| <b>VASerB</b> | H1B3...O5A <sup>ii</sup> | 0.021     | 0.088             | 0.019 | -0.016 | -4.935           |
|               | H5A...O1W <sup>i</sup>   | 0.127     | 0.050             | 0.089 | -0.165 | -51.788          |
| <b>VATrpA</b> | H5A1...O12B              | 0.099     | 0.125             | 0.075 | -0.118 | -37.001          |
|               | H11D...N5A               | 0.013     | 0.064             | 0.013 | -0.010 | -3.214           |
| <b>VATrp*</b> | H5A1...O12B              | 0.094     | 0.142             | 0.074 | -0.112 | -35.002          |
|               | H7B...O5A <sup>iii</sup> | 0.012     | 0.055             | 0.011 | -0.008 | -2.458           |
| <b>VATyr</b>  | H5A...O92B               | 0.064     | 0.147             | 0.053 | -0.068 | -21.435          |
|               | H8B...N5A <sup>v</sup>   | 0.019     | 0.081             | 0.017 | -0.014 | -4.498           |
|               | H7B2...N5A               | 0.008     | 0.027             | 0.005 | -0.004 | -1.327           |
| <b>VAHisA</b> | H12W...O5B               | 0.029     | 0.105             | 0.025 | -0.025 | -7.764           |
|               | H4C...N5B <sup>v</sup>   | 0.013     | 0.053             | 0.011 | -0.009 | -2.937           |
|               | H3C...N5B <sup>v</sup>   | 0.012     | 0.047             | 0.010 | -0.008 | -2.476           |
| <b>VAHisB</b> | H7D1...O5A <sup>vi</sup> | 0.037     | 0.128             | 0.033 | -0.034 | -10.717          |
|               | H7D...O5A                | 0.014     | 0.052             | 0.011 | -0.008 | -2.630           |
|               | H2D...O5A <sup>v</sup>   | 0.020     | 0.084             | 0.018 | -0.016 | -4.946           |

|               |                            |       |       |       |        |         |
|---------------|----------------------------|-------|-------|-------|--------|---------|
| <b>VALysA</b> | H1C1...N5A <sup>vii</sup>  | 0.013 | 0.047 | 0.010 | -0.008 | -2.410  |
|               | H1W1...O5A                 | 0.019 | 0.081 | 0.017 | -0.014 | -4.498  |
|               | H1C1...O5A <sup>vii</sup>  | 0.040 | 0.114 | 0.033 | -0.037 | -11.500 |
| <b>VALysB</b> | H1D2...N5B <sup>viii</sup> | 0.029 | 0.081 | 0.020 | -0.020 | -6.371  |
|               | H1D1...O5B <sup>ix</sup>   | 0.039 | 0.114 | 0.031 | -0.034 | -10.782 |
|               | H2W1...O5B                 | 0.018 | 0.077 | 0.016 | -0.013 | -4.122  |

**Table S7** TDDFT calculations for model clusters constructed from VA and HIS ions, as derived from the VAHIS crystal structure and optimized. Cluster 1 consists of one VA anion, one HIS cation, and a water molecule (the VAHIS asymmetric unit). Cluster 2 contains one VA anion and one HIS cation.

|                                            | VAHis cluster 1             | VAHis cluster 2              |
|--------------------------------------------|-----------------------------|------------------------------|
| Position of the n- $\pi^*$ absorption band | 613.49nm                    | 636.48nm                     |
| H...A bond length                          | 1.804Å<br>(H2O)H...O(oxime) | 2.109 Å<br>(NH2)H...O(oxime) |

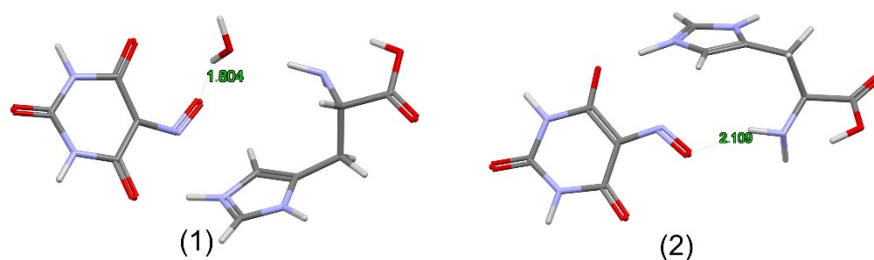

**Fig. S20** Clusters selected for the calculations with marked hydrogen bonds.

#### References:

- 1 B. Ivanova and M. Spiteller, *J. Food Meas. Charact.*, 2014, **8**, 343–355.
- 2 G. S. Nichol and W. Clegg, *Acta Crystallogr. Sect. C Cryst. Struct. Commun.*, 2005, **61**, 721–724.
- 3 P. Liebing, F. Stein, L. Hilfert, V. Lorenz, K. Oliynyk and F. T. Edelmann, *Zeitschrift für Anorg. und Allg. Chemie*, 2019, **645**, 36–43.
- 4 T. Kolev, B. B. Koleva, R. W. Seidel, M. Spiteller and W. S. Sheldrick, *Cryst. Growth Des.*, 2009, **9**, 3348–3352.
- 5 B. B. Ivanova and M. Spiteller, *Cryst. Growth Des.*, 2010, **10**, 2470–2474.
- 6 B. B. Koleva, R. Bakalska, R. W. Seidel, T. Kolev, H. Mayer-Figge, W. S. Sheldrick and M. Spiteller, *J. Mol. Struct.*, 2010, **965**, 89–97.
- 7 B. Ivanova, T. Kolev, M. Lamshöft, H. Mayer-Figge, R. Seidel, W. S. Sheldrick and M. Spiteller, *J. Mol. Struct.*, 2010, **971**, 8–11.
- 8 G. S. Nichol and W. Clegg, *Acta Crystallogr. Sect. C Cryst. Struct. Commun.*, 2007, **63**, 609–612.
- 9 M. Gryl, A. Rydz, J. Wojnarska, A. Krawczuk, M. Kozie, T. Seidler, K. Ostrowska, M. Marzec and K. M. Stadnicka, *IUCr*, 2019, **6**, 226–237.
- 10 G. S. Nichol and W. Clegg, *Acta Crystallogr. Sect. E Struct. Reports Online*, DOI:10.1107/S160053680503343X.
- 11 K. Guille, R. W. Harrington and W. Clegg, *Acta Crystallogr. Sect. C Cryst. Struct. Commun.*, 2007, **63**, 327–329.

- 12 K. G. R. Pachler, *Spectrochim. Acta*, 1963, **19**, 2085–2092.
- 13 J. Rak, P. Skurski, J. Simons and M. Gutowski, *J. Am. Chem. Soc.*, 2001, **123**, 11695–11707.
- 14 J. Norberg, N. Foloppe and L. Nilsson, *J. Chem. Theory Comput.*, 2005, **1**, 986–993.
- 15 L. Xian, S. Liu, Y. Ma and G. Lu, *Spectrochim. Acta - Part A Mol. Biomol. Spectrosc.*, 2007, **67**, 368–371.
- 16 H. Ogura, Y. Arata and S. Fujiwara, *J. Mol. Spectrosc.*, 1967, **23**, 76–85.
- 17 M. REDDY, B. NAGI REDDY, K. SRIDHARAN and J. RAMAKRISHNA, *Org. Magn. Reson.*, 1984, **22**, 464–467.
- 18 M. Kraszni, Z. Szakács and B. Noszál, *Anal. Bioanal. Chem.*, 2004, **378**, 1449–1463.
- 19 V. Govindaraju, K. Young, A. A. Maudsley, *NMR Biomed.* 2000, **13**, **129-153**.
- 20 A. Shrivastava and V. Gupta, *Chronicles Young Sci.*, 2011, **2**, 21.
